# Supplementary material for: Changes in Brain Energy and Membrane Metabolism in Glioblastoma following Chemoradiation
Source: MDPI journal article supplement (doi:10.3390/curroncol28060424), 2021-12-01
Supplement: s1 [file s1]

Supplementary Materials

# Changes in Brain Energy and Membrane Metabolism in Glioblastoma Following Chemoradiation

Astrid Ellen Grams, Stephanie Mangesius, Ruth Steiger, Ivan Radovic, Andreas Rietzler, Lisa Maria Walchhofer, Malik Galijašević, Julian Mangesius, Martha Nowosielski, Christian Franz Freyschlag, Johannes Kerschbaumer and Elke Ruth Gizewski

**Table S1.** Analysed individuals and analysed voxels (total voxels minus excluded outliers) reported in Figure 3:.

|         |           | Individuals | Voxels | Outliers |
|---------|-----------|-------------|--------|----------|
| PCr/ATP | Baseline  | 20          | 154    | 2        |
|         | Follow up | 15          | 70     | 0        |
|         | Control   | 125         | 3030   | 8        |
| PCr/Pi  | Baseline  | 20          | 154    | 4        |
|         | Follow up | 15          | 70     | 0        |
|         | Control   | 125         | 3030   | 33       |
| Pi/ATP  | Baseline  | 20          | 154    | 5        |
|         | Follow up | 15          | 70     | 2        |
|         | Control   | 125         | 3030   | 27       |
| PME/PDE | Baseline  | 20          | 154    | 1        |
|         | Follow up | 15          | 70     | 3        |
|         | Control   | 125         | 3030   | 22       |
| PME/PCr | Baseline  | 20          | 154    | 2        |
|         | Follow up | 15          | 70     | 0        |
|         | Control   | 125         | 3030   | 7        |
| PDE/ATP | Baseline  | 20          | 154    | 4        |
|         | Follow up | 15          | 70     | 3        |
|         | Control   | 125         | 3030   | 13       |

**Table S2.** Analysed individuals and analysed voxels (total voxels minus excluded outliers) reported in Figure 4:.

|         |           | Individuals | Adjacent |          | Distant ipsilateral |          | Contralateral |          |
|---------|-----------|-------------|----------|----------|---------------------|----------|---------------|----------|
|         |           |             | Voxels   | Outliers | Voxels              | Outliers | Voxels        | Outliers |
| PCr/ATP | Baseline  | 20          | 255      | 6        | 476                 | 2        | 693           | 0        |
|         | Follow up | 20          | 235      | 3        | 490                 | 5        | 651           | 0        |
|         | Control   | 125         | 3030     | 8        | 3030                | 8        | 3030          | 8        |
| PCr/Pi  | Baseline  | 20          | 255      | 0        | 476                 | 10       | 693           | 7        |
|         | Follow up | 20          | 235      | 8        | 490                 | 10       | 651           | 11       |
|         | Control   | 125         | 3030     | 33       | 3030                | 33       | 3030          | 33       |
| Pi/ATP  | Baseline  | 20          | 255      | 4        | 476                 | 6        | 693           | 7        |
|         | Follow up | 20          | 235      | 7        | 490                 | 9        | 651           | 5        |
|         | Control   | 125         | 3030     | 27       | 3030                | 27       | 3030          | 27       |
| PME/PDE | Baseline  | 20          | 255      | 0        | 476                 | 4        | 693           | 2        |
|         | Follow up | 20          | 235      | 5        | 490                 | 9        | 651           | 1        |
|         | Control   | 125         | 3030     | 22       | 3030                | 22       | 3030          | 22       |
| PME/PCr | Baseline  | 20          | 255      | 0        | 476                 | 3        | 693           | 4        |
|         | Follow up | 20          | 235      | 0        | 490                 | 7        | 651           | 1        |
|         | Control   | 125         | 3030     | 7        | 3030                | 7        | 3030          | 7        |
| PDE/ATP | Baseline  | 20          | 255      | 0        | 476                 | 5        | 693           | 2        |

|                  |     |      |    |      |    |      |    |
|------------------|-----|------|----|------|----|------|----|
| <b>Follow up</b> | 20  | 235  | 9  | 490  | 4  | 651  | 0  |
| <b>Control</b>   | 125 | 3030 | 13 | 3030 | 13 | 3030 | 13 |

**Table S3.** Analysed individuals and analysed voxels (total voxels minus excluded outliers) reported in Figure 5

|         |    | Individuals | Adjacent |          | Distant ipsilateral |          | Contralateral |          |
|---------|----|-------------|----------|----------|---------------------|----------|---------------|----------|
|         |    |             | Voxels   | Outliers | Voxels              | Outliers | Voxels        | Outliers |
| PCr/ATP | SD | 5           | 35       | 2        | 147                 | 4        | 172           | 0        |
|         | PD | 15          | 200      | 1        | 343                 | 2        | 479           | 0        |
| PCr/Pi  | SD | 5           | 35       | 2        | 147                 | 3        | 172           | 5        |
|         | PD | 15          | 200      | 2        | 343                 | 9        | 479           | 9        |
| Pi/ATP  | SD | 5           | 35       | 0        | 147                 | 0        | 172           | 2        |
|         | PD | 15          | 200      | 7        | 343                 | 9        | 479           | 3        |
| PME/PDE | SD | 5           | 35       | 0        | 147                 | 0        | 172           | 0        |
|         | PD | 15          | 200      | 6        | 343                 | 8        | 479           | 1        |
| PME/PCr | SD | 5           | 35       | 0        | 147                 | 0        | 172           | 0        |
|         | PD | 15          | 200      | 0        | 343                 | 7        | 479           | 7        |
| PDE/ATP | SD | 5           | 35       | 0        | 147                 | 0        | 172           | 0        |
|         | PD | 15          | 200      | 3        | 343                 | 4        | 479           | 4        |
